# Supplementary material for: Biomarkers for Severity of Spinal Cord Injury in the Cerebrospinal Fluid of Rats
Source: PLoS One. 2011 Apr 29;6(4):e19247. doi: 10.1371/journal.pone.0019247 (PMC3084780; doi:10.1371/journal.pone.0019247)
Supplement: Table S3 — CSF protein ratios after moderate or severe spinal cord injury. Protein ratios are relative to protein levels in CSF from sham animals. M/C - moderate/sham; S/C - severe/sham. (XLS) [file pone.0019247.s003.xls]

## Sheet: Sheet1
Supplementary Table 2. CSF protein ratios after moderate or severe spinal cord injury (protein ratios are relative to protein levels in CSF from sham animals). M/C - moderate/sham; S/C - severe/sham.
	Protein ID	Protein description	RUN 1				RUN 2				RUN 3				AVERAGE
			moderate		severe		moderate		severe		moderate		severe		moderate		severe
			M/C	SD	S/C	SD	M/C	SD	S/C	SD	M/C	SD	S/C	SD	M/C	SEM	S/C	SEM
1	IPI00207146	MGC72973 Zero beta-1 globin	12.35	7.72	2.02	1.17	2.51	0.25	0.75	0.05	3.48	0.66	0.32	0.26	6.11333	0.776233	1.03	0.313389
2	IPI00230835	Ywhag 14-3-3 protein gamma	4.46	0	7.1	0	ND	ND	ND	ND	6.06	0	3.5	0	5.26	NA	5.3	NA
3	IPI00188541	tih4 inter-alpha-inhibitor H4 heavy chain	5.56	4.7	2.55	2.29	5.18	0	2.22	0	2.82	1.17	0.75	0.34	4.52	0.406127	1.84	0.326306
4	IPI00476458	Gpx3 Glutathione peroxidase 3	3.34	0	2.36	0	4.98	1.5	2.14	0.04	4.13	1.32	1.1	0.34	4.15	0.30188	1.86667	0.273456
5	IPI00326140	Pzp Alpha-1-macroglobulin	5.62	4.84	3.36	2.21	3.03	0.63	1.96	0.53	2.92	0.65	0.98	0.42	3.85667	0.412052	2.1	0.364564
6	IPI00368550	C5 similar to Complement C5 precursor	5.5	0	2.81	0	ND	ND	ND	ND	2	0.11	0.59	0.02	3.75	NA	1.7	NA
7	IPI00230897	Hbb Hemoglobin subunit beta-1	4.03	3.59	0.77	0.52	2.76	0.39	0.76	0.13	2.99	0.75	0.47	0.16	3.26	0.274202	0.666667	0.137595
8	IPI00231370	S100a8 Protein S100-A8	ND	ND	ND	ND	5.32	0	11.84	0	0.95	0.68	3.31	2	3.135	NA	7.575	NA
9	IPI00231192	MGC72973;LOC689064;LOC100134871 Hemoglobin subunit beta-2	3.47	0.36	0.68	0.1	3.09	0.73	0.85	0.18	2.82	0.81	0.77	0.29	3.12667	0.190481	0.766667	0.0972105
10	IPI00781399	LOC678701 64 kDa protein	2.54	0.29	1.84	0.84	3.24	0.12	2.34	0.03	2.85	0.46	1.51	0.33	2.87667	0.197417	1.89667	0.215482
11	IPI00324893	Ywhaz 14-3-3 protein zeta/delta	3.8	2.5	5.01	2.72	2.18	1.89	3.19	2.47	2.55	0.23	2.22	0.27	2.84333	0.307119	3.47333	0.396711
12	IPI00568389	LOC500183 protein	4.88	3.8	3.23	1.51	1.78	0.33	1.6	0.34	1.68	0.44	0.68	0.54	2.78	0.44961	1.83667	0.378795
13	IPI00201561	Prdx2 Peroxiredoxin-2	ND	ND	ND	ND	2.45	1.61	0.44	0.19	3.08	0.13	0.36	0.11	2.765	NA	0.4	NA
14	IPI00188338	Itih1 Itih1 protein	3.09	1.58	2.61	1	2.26	0.33	2.25	0.35	2.79	1.6	0.99	0.6	2.71333	0.216096	1.95	0.307435
15	IPI00197703	Apoa1 Apolipoprotein A-I	2.86	1.07	2.28	0.88	2.59	0.77	2.08	0.66	2.49	0.65	1	0.59	2.64667	0.14583	1.78667	0.276601
16	IPI00372372	Serpinc1 Serine (Or cysteine) peptidase inhibitor, clade C (Antithrombin), member 1	4.48	3.08	2.83	1.26	1.8	0.71	1.53	0.54	1.63	0.48	0.63	0.43	2.63667	0.421457	1.66333	0.350562
17	IPI00230787	Car2 Carbonic anhydrase 2	ND	ND	ND	ND	2.6	0	0.76	0	2.53	0	0.41	0	2.565	NA	0.585	NA
18	IPI00230937	Pebp1 Phosphatidylethanolamine-binding protein 1	ND	ND	ND	ND	3.1	0	3.38	0	1.99	0.37	1.32	0.51	2.545	NA	2.35	NA
19	IPI00287835	Hba-a2 Hemoglobin subunit alpha-1/2	2.24	1.64	0.42	0.11	2.55	0.51	0.74	0.18	2.4	1.16	0.39	0.12	2.39667	0.131245	0.516667	0.146816
20	IPI00360930	Car1 Carbonic anhydrase 1	2.05	0	0.27	0	2.8	0.25	0.52	0.04	2.33	0.27	0.39	0.17	2.39333	0.205207	0.393333	0.117867
21	IPI00210900	Ambp AMBP protein	2.43	1.22	2.05	0.81	2.63	1.18	2.13	0.96	2.03	0.41	0.88	0.44	2.36333	0.184242	1.68667	0.278834
22	IPI00389806	LOC498793 LOC498793 protein	2.16	0.89	1.9	0.41	2.37	0.29	2.2	0.2	2.26	0.12	1.21	0.16	2.26333	0.108033	1.77	0.237497
23	IPI00565114	13 kDa protein	2.7	1.4	2.05	0.96	2.09	0.52	2.03	0.24	1.92	0.21	0.86	0.03	2.23667	0.21348	1.64667	0.275146
24	IPI00326412	Eno2 Gamma-enolase	0.81	0	0.74	0	ND	ND	ND	ND	3.51	0	2.62	0	2.16	NA	1.68	NA
25	IPI00559019	13 kDa protein	2.73	1.09	2.84	1.29	2.09	0.33	2.05	0.23	1.64	0.41	1.09	0.14	2.15333	0.246701	1.99333	0.31205
26	IPI00392886	A2m Alpha-2-macroglobulin	2.4	1.21	1.47	0.5	2.08	0.44	1.21	0.45	1.96	0.58	0.62	0.24	2.14667	0.158972	1.1	0.219986
27	IPI00188225	Crp C-reactive protein	2.29	0.08	2.33	0.14	2.16	0.32	1.51	0.39	1.95	0.33	0.96	0.5	2.13333	0.138067	1.6	0.276771
28	IPI00204451	Cfi Complement factor I	1.45	0.19	1.77	0.46	2.81	1.24	2.25	0.46	ND	ND	ND	ND	2.13	NA	2.01	NA
29	IPI00565708	Hp Isoform 1 of Haptoglobin	ND	ND	ND	ND	2.3	0.38	1.3	0.25	1.95	0.43	0.74	0.34	2.125	NA	1.02	NA
30	IPI00191715	Orm1 Alpha-1-acid glycoprotein	2.43	1.76	1.29	0.82	1.93	0.3	1.01	0.29	1.93	0.71	0.54	0.18	2.09667	0.179095	0.946667	0.205207
31	IPI00782787	LOC362795 Ig gamma-2C chain C region	1.96	0.97	1.91	0.62	2.15	1.21	1.76	0.37	2.07	1.04	0.82	0.27	2.06	0.102953	1.49667	0.25621
32	IPI00679245	MGC108747 T-kininogen 2	2.1	0.81	1.21	0.41	2.08	0.6	1.38	0.5	1.83	0.61	0.68	0.22	2.00333	0.12929	1.09	0.201412
33	IPI00231783	Ldhb L-lactate dehydrogenase B chain	2.51	0.33	3.58	0.35	1.5	0	2.01	0	1.99	0.64	1.48	0.35	2	0.236895	2.35667	0.348342
34	IPI00189981	F2 Prothrombin (Fragment)	ND	ND	ND	ND	1.97	0	2.59	0	1.98	1.15	0.57	0.2	1.975	NA	1.58	NA
35	IPI00326984	Itih3 Inter-alpha-trypsin inhibitor heavy chain H3	ND	ND	ND	ND	2.11	0.57	1.73	0.25	1.84	0.52	1.01	0.38	1.975	NA	1.37	NA
36	IPI00480639	C3 Complement C3 (Fragment)	2.47	1.33	1.74	0.78	1.84	0.34	1.42	0.34	1.58	0.36	0.77	0.29	1.96333	0.225497	1.31	0.234347
37	IPI00778633	Apoh Apolipoprotein H	2.45	2.25	2.05	0.97	1.81	0.19	2	0.46	1.6	0.59	0.84	0.23	1.95333	0.2218	1.63	0.275805
38	IPI00195516	Hpx Hemopexin	2.65	1.96	2.07	1.13	1.71	0.42	1.37	0.32	1.47	0.3	0.86	0.25	1.94333	0.263237	1.43333	0.259804
39	IPI00200757	Fn1 Isoform 1 of Fibronectin	2.26	1.28	1.45	0.66	ND	ND	ND	ND	1.62	0.23	0.8	0.26	1.94	NA	1.125	NA
40	IPI00201262	LOC297568;Mug1;Mug2 Alpha-1-inhibitor 3	2.02	1.26	2.13	0.84	2.02	0.6	2.1	0.44	1.66	0.49	1.08	0.33	1.9	0.151967	1.77	0.257713
41	IPI00199695	Serpinf2 Serine (Or cysteine) peptidase inhibitor, clade F, member 2	1.77	0.7	1.45	0.36	2.11	0	1.2	0	1.7	0.64	0.92	0.34	1.86	0.156104	1.19	0.17164
42	IPI00212666	Mug1 Isoform 1 of Murinoglobulin-1	1.97	1.16	2.12	0.88	1.96	0.39	2.1	0.43	1.64	0.5	1.07	0.36	1.85667	0.144417	1.76333	0.258312
43	IPI00231423	C9 C9 protein	2.02	0.35	1.58	0.31	1.85	0.28	1.42	0.14	1.68	0.2	0.78	0.33	1.85	0.137437	1.26	0.216877
44	IPI00515829	Kng1 Rat T-kininogen	1.71	0.72	0.96	0.49	2.03	0.32	1.14	0.2	1.67	0.54	0.64	0.27	1.80333	0.148067	0.913333	0.167745
45	IPI00358343	14 kDa protein	1.59	0	1.54	0	ND	ND	ND	ND	1.99	0	1.27	0	1.79	NA	1.405	NA
46	IPI00372792	Serping1 Plasma protease C1 inhibitor	3.06	1.43	2.57	1.34	1	0.24	1.11	0.41	1.24	0.51	0.39	0.13	1.76667	0.353784	1.35667	0.351305
47	IPI00231929	Pkm2 Isoform M1 of Pyruvate kinase isozymes M1/M2	1.99	1.12	1.16	0.66	1.76	0.22	2.36	0.6	1.54	0.74	0.88	0.25	1.76333	0.15812	1.46667	0.295562
48	IPI00231368	Txn1 Thioredoxin	1.32	0	1.1	0	1.84	0	1.39	0	1.82	0.1	0.46	0.41	1.66	0.180929	0.983333	0.22994
49	IPI00191737	Alb Serum albumin	2.43	3.4	2.37	2.26	1.27	0.33	1.3	0.35	1.24	0.4	0.74	0.31	1.64667	0.274581	1.47	0.30335
50	IPI00558944	12 kDa protein	1.28	0	3.32	0	2	0.1	4.86	0.11	ND	ND	ND	ND	1.64	NA	4.09	NA
51	IPI00215299	C1qc Complement C1q subcomponent subunit C	2.26	0	1.65	0	1.38	0	1.01	0	1.27	0.22	0.51	0.15	1.63667	0.245542	1.05667	0.251977
52	IPI00200591	LOC299282 Serine protease inhibitor A3L	2.21	1.39	2.33	1.13	1.35	0.29	1.52	0.31	1.3	0.43	0.72	0.35	1.62	0.238413	1.52333	0.299074
53	IPI00777971	Csf1r colony stimulating factor 1 receptor	ND	ND	ND	ND	2.29	0	1.75	0	0.95	0.07	0.42	0.29	1.62	NA	1.085	NA
54	IPI00206780	Plg Plasminogen	1.76	0.78	2.02	0.9	1.55	0.23	1.56	0.32	1.54	0.38	0.85	0.27	1.61667	0.117488	1.47667	0.255916
55	IPI00189819	Actb Actin, cytoplasmic 1	1.47	0.32	1.87	0.35	1.81	0.44	2.07	0.39	1.56	0.34	1.06	0.22	1.61333	0.139906	1.66667	0.243771
56	IPI00327745	Apcs Serum amyloid P-component	1.37	0	1.21	0	1.82	0.13	1.46	0.02	1.63	0.23	0.92	0.3	1.60667	0.158432	1.19667	0.173284
57	IPI00211075	Serpina3n Serine protease inhibitor A3N	2.04	1.26	1.62	0.79	1.47	0.56	1.23	0.31	1.3	0.53	0.59	0.32	1.60333	0.207525	1.14667	0.240377
58	IPI00208659	Cfh Complement inhibitory factor H	1.49	0.39	1.33	0.37	1.71	0.26	1.52	0.99	1.6	0.45	0.56	0.13	1.6	0.110554	1.13667	0.237665
59	IPI00202440	Igh-1a Igh-1a protein	1.49	0.35	1.29	0.27	1.7	0.39	1.55	0.15	1.6	0.54	0.94	0.22	1.59667	0.108033	1.26	0.184422
60	IPI00361346	IgG-2a LOC367586 protein	ND	ND	ND	ND	1.66	0.27	1.75	0.22	1.44	0.33	0.91	0.28	1.55	NA	1.33	NA
61	IPI00194097	Gc Vitamin D-binding protein	1.73	1.03	1.87	0.95	1.53	0.34	1.54	0.29	1.38	0.47	0.99	0.44	1.54667	0.13968	1.46667	0.222251
62	IPI00476292	Cp 121 kDa protein	ND	ND	ND	ND	1.51	0.35	1.45	0.38	1.49	0.59	0.87	0.32	1.5	NA	1.16	NA
63	IPI00231734	Aldoa Fructose-bisphosphate aldolase A	ND	ND	ND	ND	1.31	0.4	1.22	0.12	1.68	0.21	1.53	1.19	1.495	NA	1.375	NA
64	IPI00210091	Serpina3m similar to Serine protease inhibitor A3M precursor	1.67	0.3	1.51	0.13	1.57	0.09	1.59	0.31	1.24	0.41	0.54	0.25	1.49333	0.15812	1.21333	0.254841
65	IPI00210120	Vtn Aa1018	1.21	0	1.05	0	1.4	0	0.96	0	1.87	0.33	1.27	0.23	1.49333	0.194295	1.09333	0.133116
66	IPI00207668	Afm Afamin	1.46	0.5	1.93	0.57	1.57	0.45	1.58	0.34	1.39	0.34	0.94	0.18	1.47333	0.100409	1.48333	0.23618
67	IPI00201347	Hrg Histidine-rich glycoprotein 1	1.48	0.72	1.42	0.44	1.56	0.31	1.46	0.5	1.21	0.29	0.85	0.38	1.41667	0.142748	1.24333	0.194714
68	IPI00327469	Ahsg Alpha-2-HS-glycoprotein	1.25	0.24	1.75	0.34	1.48	0.28	1.85	0.38	1.32	0.43	1.08	0.36	1.35	0.114454	1.56	0.215687
69	IPI00195148	Es1 Liver carboxylesterase 1	1.6	0.81	1.47	0.53	1.21	0.28	1.13	0.26	1.22	0.23	0.53	0.15	1.34333	0.157175	1.04333	0.229965
70	IPI00324019	Serpina1 Alpha-1-antiproteinase	1.42	0.87	1.49	0.77	1.36	0.26	1.35	0.21	1.24	0.26	0.74	0.2	1.34	0.100913	1.19333	0.210499
71	IPI00212708	Fetub Fetub protein	1.38	0.61	1.26	0.39	1.4	0.29	1.34	0.32	1.16	0.21	0.76	0.25	1.31333	0.12164	1.12	0.186882
72	IPI00370486	Ig lambda-2 chain C region	0.98	0	1.04	0	1.49	0.2	1.27	0.01	1.41	0	0.7	0	1.29333	0.174575	1.00333	0.178501
73	IPI00205568	Serpina4 Kallistatin	1.01	0	2.11	0	1.44	0	1.77	0	1.42	0	0.79	0	1.29	0.164213	1.55667	0.275957
74	IPI00421513	Got1 Aspartate aminotransferase, cytoplasmic	1.06	0.18	1.34	0.28	1.28	0.33	1.44	0.46	1.47	0.51	0.89	0.28	1.27	0.15099	1.22333	0.180423
75	IPI00476644	Serpina10 50 kDa protein	0.49	0	1.28	0	1.46	1.66	1.48	0.38	1.85	0.84	1.6	1.21	1.26667	0.278948	1.45333	0.134022
76	IPI00554077	Ighg Immunoglobulin heavy chain	1.16	0.07	0.9	0.12	1.18	0.28	0.8	0.23	1.42	0.75	0.57	0.34	1.25333	0.126791	0.756667	0.137119
77	IPI00194733	Atrn Isoform 1 of Attractin	1.93	0	2.52	0	0.98	0	0.87	0	0.82	0.15	0.34	0.06	1.24333	0.258205	1.24333	0.355425
78	IPI00655254	RGD1310507 LRRGT00161	1.3	0.18	1.71	0.23	1.17	0.29	1.53	0.13	1.26	0.28	0.83	0.36	1.24333	0.0860125	1.35667	0.227279
79	IPI00198667	Clu Clusterin	1.66	0.84	1.15	0.58	1.22	1.04	0.82	0.21	0.77	0.31	0.39	0.15	1.21667	0.222363	0.786667	0.205776
80	IPI00370411	Fbln1 fibulin 1	1.39	0.59	1.19	0.46	1.32	0.19	0.79	0.05	0.87	0.18	0.54	0.26	1.19333	0.177073	0.84	0.190867
81	IPI00679202	Trf Isoform 1 of Serotransferrin	1.35	0.83	1.46	0.61	1.13	0.19	1.18	0.19	1.03	0.26	0.67	0.83	1.17	0.134869	1.10333	0.210961
82	IPI00204053	RGD1561211 similar to Amyloid-like protein 1 precursor	0.55	0.1	0.64	0.11	2.23	1.5	2.36	1.6	0.72	0.26	0.38	0.13	1.16667	0.320553	1.12667	0.345765
83	IPI00766303	C7 similar to complement component 7 precursor	1.16	0.45	1.26	0.36	1.15	0.31	0.98	0.23	ND	ND	ND	ND	1.155	NA	1.12	NA
84	IPI00758468	Pgcp Plasma glutamate carboxypeptidase	ND	ND	ND	ND	1.4	0.38	1.27	0.21	0.9	0	0.51	0	1.15	NA	0.89	NA
85	IPI00782664	Serpina3k serine protease inhibitor 2b	ND	ND	ND	ND	1.22	0.11	1.52	0.48	1.07	0.18	0.82	0.22	1.145	NA	1.17	NA
86	IPI00557643	13 kDa protein	1.17	0.01	1.18	0.32	1.09	0.27	1.32	0.43	1.02	0.22	1.05	0.29	1.09333	0.0913209	1.18333	0.122488
87	IPI00213036	Clic1;Ly6g6c;Rps25-ps2;Ng23;Skiv2l;Bat4;Ng35;C4b;Ly6g6e;Stk19;G7e;Apom;Cfb;LOC684148;C2;Ehmt2;Rdbp;Neu1;Lsm2 Complement C4	1.05	0.25	0.9	0.15	1.22	0.22	1	0.16	1	0.19	0.56	0.16	1.09	0.113199	0.82	0.160087
88	IPI00371498	Prg4 proteoglycan 4	1.76	0	1.38	0	ND	ND	ND	ND	0.41	0	0.33	0	1.085	NA	0.855	NA
89	IPI00212319	App Isoform APP770 of Amyloid beta A4 protein (Fragment)	1.73	0.81	1.23	0.15	0.61	0	0.43	0	0.86	0.19	0.38	0.07	1.06667	0.255583	0.68	0.23021
90	IPI00324459	Penk1 Proenkephalin A	1.24	0.34	1	0.46	1.25	0	1.27	0	0.66	0.04	0.24	0.04	1.05	0.193731	0.836667	0.243601
91	IPI00194044	Clic1;Ly6g6c;Rps25-ps2;Ng23;Skiv2l;Bat4;Ng35;C4b;Ly6g6e;Stk19;G7e;Apom;Cfb;LOC684148;C2;Ehmt2;Rdbp;Neu1;Lsm2 Complement component 2	1.08	0.7	0.94	0.43	1.01	0	1.01	0	0.99	0.05	0.58	0.04	1.02667	0.0724631	0.843333	0.160112
92	IPI00188909	Col1a1 Collagen alpha-1(I) chain	1.3	1.11	0.9	0.4	0.98	0.27	0.74	0.16	0.73	0.01	0.36	0.03	1.00333	0.178175	0.666667	0.175553
93	IPI00189627	Chga Chromogranin-A	ND	ND	ND	ND	1.18	0	1.36	0	0.82	0.24	0.46	0.07	1	NA	0.91	NA
94	IPI00210824	Serpina6 Corticosteroid-binding globulin	0.96	0.34	0.62	0.54	1.03	0.07	1.22	0.3	1	0.26	0.67	0.21	0.996667	0.0624667	0.836667	0.19233
95	IPI00211146	Dkk3 Dkk3 protein	0.7	0	1.21	0	0.96	0.05	0.82	0.23	1.27	0.81	0.49	0.13	0.976667	0.178065	0.84	0.200116
96	IPI00210228	Ctss Cathepsin S	1.07	0.75	0.82	0.28	1.02	0.17	0.72	0.15	0.83	0.13	0.43	0.21	0.973333	0.118614	0.656667	0.150025
97	IPI00326888	Chgb Secretogranin-1	1.04	0.16	0.96	0.19	0.68	0.06	0.69	0.08	1.16	0.67	0.32	0.15	0.96	0.1666	0.656667	0.188944
98	IPI00203102	Ptgds Prostaglandin-H2 D-isomerase	1.36	1.01	1.02	0.53	0.84	0.36	0.9	0.53	0.63	0.39	1.19	1.03	0.943333	0.204345	1.03667	0.127243
99	IPI00324272	Apoa4 Apolipoprotein A-IV	0.6	0.08	0.78	0.04	1.25	0.37	3.38	0.96	0.97	0.29	1.57	0.58	0.94	0.190332	1.91	0.384842
100	IPI00190701	Apoe Apolipoprotein E	1.12	0.87	0.91	0.53	0.89	0.11	0.84	0.07	0.8	0.31	0.45	0.13	0.936667	0.135411	0.733333	0.165951
101	IPI00231643	Sod1 Superoxide dismutase [Cu-Zn]	0.77	0.15	0.82	0.13	1.03	0.13	1.01	0.1	0.96	0.17	0.51	0.17	0.92	0.122264	0.78	0.167461
102	IPI00566304	Igsf1 Isoform 1 of Immunoglobulin superfamily member 1	1.02	0.35	0.75	0.16	1	0.11	0.82	0.06	0.72	0.15	0.39	0.13	0.913333	0.136516	0.653333	0.160112
103	IPI00200225	Fmod Fibromodulin	ND	ND	ND	ND	0.95	0	0.9	0	0.86	0	0.51	0	0.905	NA	0.705	NA
104	IPI00199670	Serpinf1 Alpha-2 antiplasmin	0.95	0.29	0.95	0.13	0.96	0.14	0.99	0.14	0.8	0.17	0.55	0.13	0.903333	0.0997936	0.83	0.164422
105	IPI00363839	Chi3l1 Chitinase-3-like protein 1	0.96	0	1.14	0	0.84	0	0.61	0	ND	ND	ND	ND	0.9	NA	0.875	NA
106	IPI00205500	Prnp Major prion protein	0.72	0	0.72	0	0.97	0	1.32	0	1	0	0.59	0	0.896667	0.130695	0.876667	0.208007
107	IPI00210612	Chl1 similar to cell adhesion molecule with homology to L1CAM	ND	ND	ND	ND	0.76	0	0.74	0	1.03	0.69	0.63	0.52	0.895	NA	0.685	NA
108	IPI00203494	Sparcl1 SPARC-like protein 1	0.91	0.4	0.94	0.35	0.89	0.11	0.81	0.09	0.88	0.15	0.45	0.12	0.893333	0.0411977	0.733333	0.167941
109	IPI00362931	Ogn osteoglycin	0.76	0	0.75	0	0.98	0.07	0.94	0.25	0.93	0.2	0.47	0.12	0.89	0.113199	0.72	0.162081
110	IPI00202873	Reln Isoform 1 of Reelin	ND	ND	ND	ND	0.86	0.09	0.77	0.13	0.88	0	0.31	0	0.87	NA	0.54	NA
111	IPI00193171	Npc2 Epididymal secretory protein 1	0.69	0.03	0.69	0.04	1.07	0.03	0.85	0.17	0.82	0.24	0.4	0.18	0.86	0.146489	0.646667	0.159202
112	IPI00391338	Icosl similar to ICOS ligand precursor	ND	ND	ND	ND	1.12	0	0.63	0	0.59	0	0.39	0	0.855	NA	0.51	NA
113	IPI00361893	Epha4 similar to Eph receptor A4	1.07	0.2	0.81	0.08	ND	ND	ND	ND	0.61	0	0.48	0	0.84	NA	0.645	NA
114	IPI00324864	Vgf Neurosecretory protein VGF	0.68	0	0.72	0	0.82	0	0.9	0	1.01	0.44	0.59	0.1	0.836667	0.135659	0.736667	0.131517
115	IPI00209744	Agt Angiotensinogen	0.9	0.51	0.81	0.3	0.89	0.12	0.86	0.4	0.71	0.11	0.5	0.08	0.833333	0.108999	0.723333	0.147204
116	IPI00363974	Gsn Gelsolin	0.85	0.33	0.68	0.24	0.86	0.14	0.78	0.08	0.75	0.12	0.41	0.1	0.82	0.0822109	0.623333	0.14583
117	IPI00324380	Ttr Transthyretin	1.07	0.62	1.07	0.56	0.79	0.16	0.91	0.17	0.59	0.18	0.66	0.24	0.816667	0.163676	0.88	0.151525
118	IPI00231801	Cst3 Cystatin-C	0.51	0.09	0.59	0.16	1.01	0.13	1.8	0.18	0.88	0.23	1.15	0.31	0.8	0.169778	1.18	0.259392
119	IPI00476991	Ncam1 Neural cell adhesion molecule 1	0.84	0.36	0.62	0.21	0.84	0.18	0.62	0.08	0.71	0.25	0.56	0.35	0.796667	0.0913209	0.6	0.0620403
120	IPI00206054	Cntn1 Contactin-1	0.64	0.07	0.81	0.15	0.94	0.39	1	0.62	0.78	0.39	0.49	0.15	0.786667	0.129147	0.766667	0.169229
121	IPI00189424	Sparc SPARC	ND	ND	ND	ND	0.71	0	0.82	0	0.85	0.29	0.26	0.18	0.78	NA	0.54	NA
122	IPI00471906	Enpp2 Isoform 1 of Ectonucleotide pyrophosphatase/phosphodiesterase family member 2	0.77	0.4	1.07	0.52	0.81	0.16	0.9	0.18	0.74	0.25	0.45	0.16	0.773333	0.0624667	0.806667	0.188669
123	IPI00464518	Hexb Beta-hexosaminidase subunit beta	0.72	0.12	0.6	0	0.78	0.05	0.61	0.18	ND	ND	ND	ND	0.75	NA	0.605	NA
124	IPI00201573	Igfbp2 Insulin-like growth factor-binding protein 2	0.45	0.17	0.58	0.21	0.96	0	2.7	0	0.83	0.15	1.59	0.44	0.746667	0.171599	1.62333	0.343251
125	IPI00212811	Ctsb Cathepsin B	0.61	0	0.91	0	0.88	0.1	0.89	0.03	ND	ND	ND	ND	0.745	NA	0.9	NA
126	IPI00204640	22 kDa protein	0.61	0.03	0.55	0.03	0.86	0	1.21	0	ND	ND	ND	ND	0.735	NA	0.88	NA
127	IPI00203132	Cntn2 Contactin-2	0.73	0.07	0.75	0.08	0.62	0.09	0.74	0.09	0.81	0.39	0.64	0.38	0.72	0.102953	0.71	0.0822109
128	IPI00373762	Pla2g7 Phospholipase A2, group VII	0.58	0	0.58	0	1.07	0.39	0.79	0.11	0.5	0.03	0.32	0.06	0.716667	0.185172	0.563333	0.161742
129	IPI00212005	Apod Apolipoprotein D	0.6	0.32	0.86	0.26	0.7	0.08	1.82	0.84	0.82	0.12	0.73	0.05	0.706667	0.11063	1.13667	0.257195
130	IPI00215256	Nov Protein NOV homolog	0.21	0	0.57	0	1.2	0	9	0	ND	ND	ND	ND	0.705	NA	4.785	NA
131	IPI00195173	Cd59b CD59 glycoprotein	0.66	0.15	0.67	0.11	0.72	0	0.78	0	0.68	0	0.44	0	0.686667	0.0582623	0.63	0.138842
132	IPI00199664	Igfbp6 Insulin-like growth factor-binding protein 6	0.41	0.08	0.29	0.11	0.95	0	1.18	0	ND	ND	ND	ND	0.68	NA	0.735	NA
133	IPI00365610	Coch Coch protein	0.71	0.09	0.95	0.68	0.68	0	1.59	0	0.59	0	0.77	0	0.66	0.0833	1.10333	0.218827
134	IPI00191139	Scg3 Secretogranin-3	0.67	0	0.62	0	0.61	0.34	0.48	0.04	0.68	0.3	0.21	0	0.653333	0.0648583	0.436667	0.152172
135	IPI00209114	Lsamp Isoform 1 of Limbic system-associated membrane protein	0.77	0	0.46	0	0.53	0	0.45	0	ND	ND	ND	ND	0.65	NA	0.455	NA
136	IPI00388323	Hspg2 396 kDa protein	0.6	0.11	0.52	0.03	0.71	0	0.39	0	0.63	0.08	0.38	0.05	0.646667	0.0794861	0.43	0.0931561
137	IPI00331757	Fam3c FAM3C-like protein	0.53	0.24	0.48	0.2	0.77	0.26	0.83	0.02	0.6	0.13	0.33	0.04	0.633333	0.117106	0.546667	0.168846
138	IPI00205389	Fgb Isoform 1 of Fibrinogen beta chain	0.81	0	1.88	0	ND	ND	ND	ND	0.4	0.05	0.52	0.22	0.605	NA	1.2	NA
139	IPI00393521	Lrg1 Leucine-rich alpha-2-glycoprotein 1	0.69	0.23	0.68	0.29	ND	ND	ND	ND	0.5	0	0.97	0	0.595	NA	0.825	NA
140	IPI00561533	Nrcam Isoform 1 of Neuronal cell adhesion molecule	0.55	0.03	0.61	0.1	ND	ND	ND	ND	0.63	0	0.54	0	0.59	NA	0.575	NA
141	IPI00188921	Col1a2 Collagen alpha-2(I) chain	ND	ND	ND	ND	0.58	0	1	0	0.59	0.28	0.45	0.25	0.585	NA	0.725	NA
142	IPI00197041	Nbl1 Neuroblastoma suppressor of tumorigenicity 1	0.47	0	0.54	0	0.7	0.02	0.64	0	0.58	0.02	0.31	0.04	0.583333	0.113057	0.496667	0.137119
143	IPI00204359	B2m Beta-2-microglobulin	0.21	0.03	0.31	0	0.79	0	1.27	0	0.6	0	1.14	0	0.533333	0.181258	0.906667	0.240555
144	IPI00199030	Scg5 Neuroendocrine protein 7B2	0.51	0	0.52	0	ND	ND	ND	ND	0.47	0.07	0.36	0.03	0.49	NA	0.44	NA
145	IPI00230944	Fgg Isoform Gamma-B of Fibrinogen gamma chain	0.32	0.03	0.93	0.16	0.49	0.21	1.1	0.39	0.4	0.07	0.5	0.19	0.403333	0.0972105	0.843333	0.185366
146	IPI00382317	Fga Ac1873	0.35	0.13	0.89	0.18	0.34	0.07	0.76	0.27	ND	ND	ND	ND	0.345	NA	0.825	NA
SD - standard deviation
SEM - standard error of the mean; calculated only for proteins detected in all 3 runs
